# Supplementary material
Source: PubMed Central journal article supplement (PMC3326507)

NG

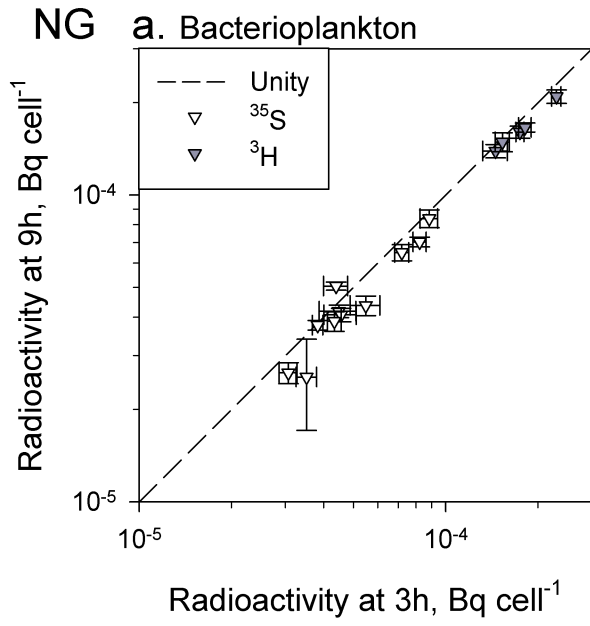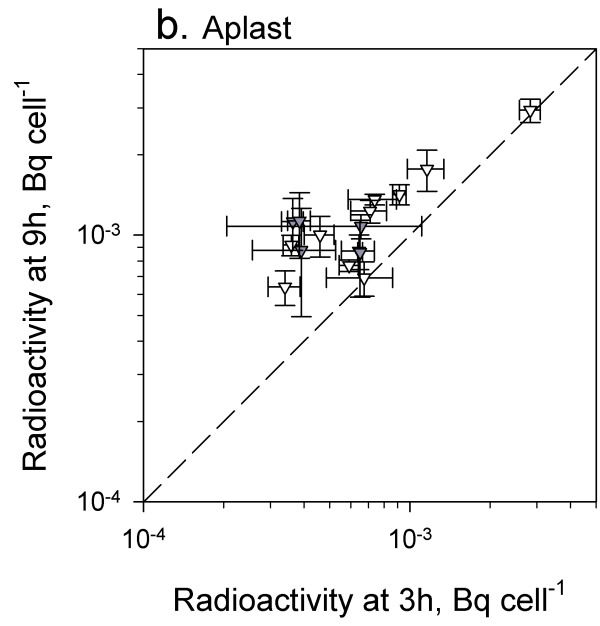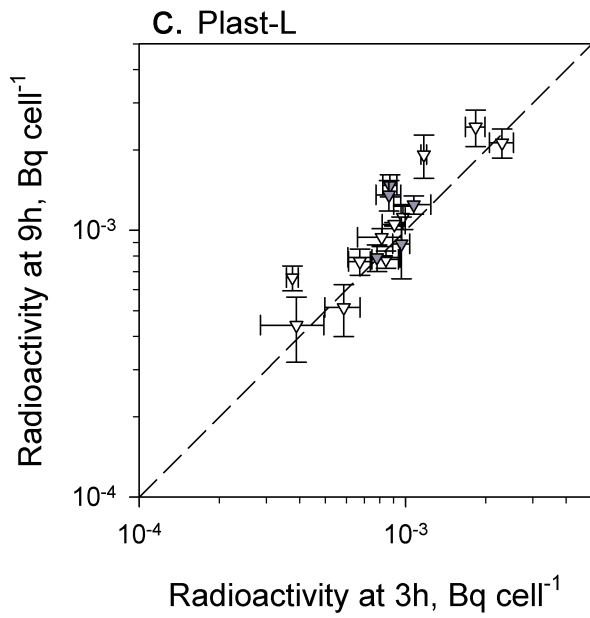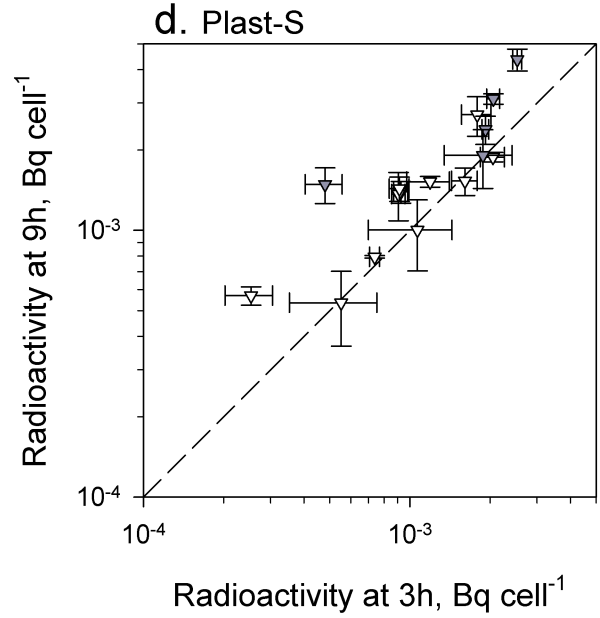

EQ

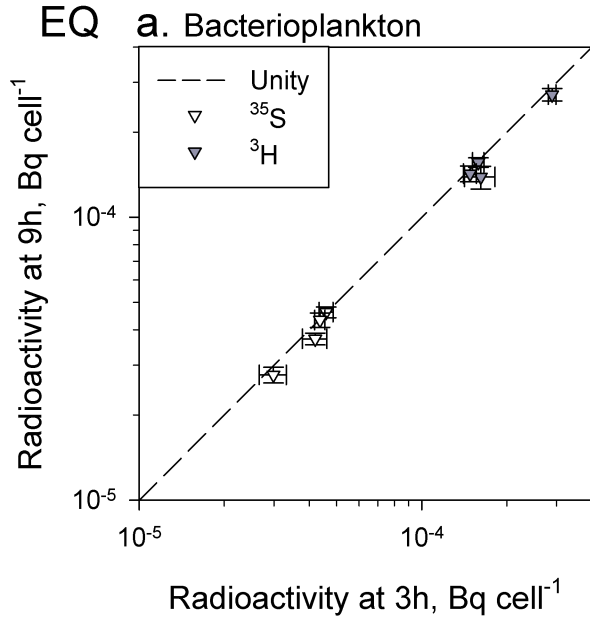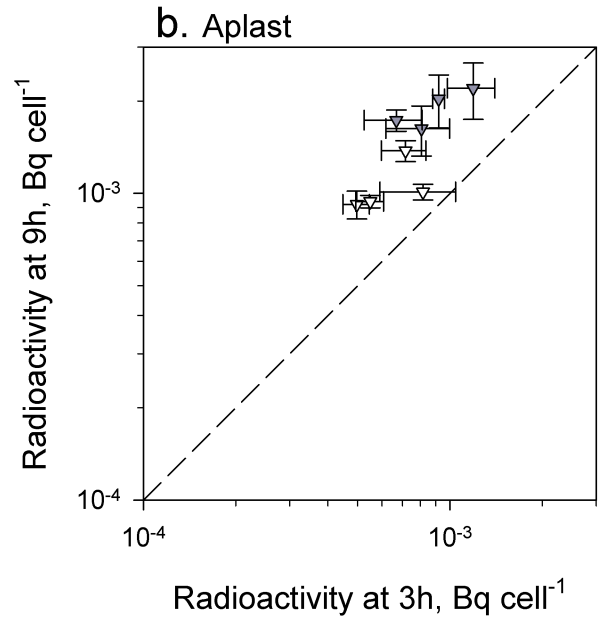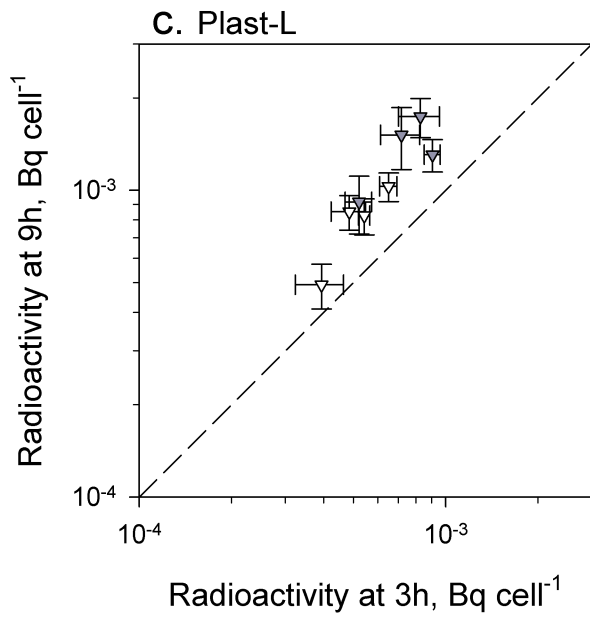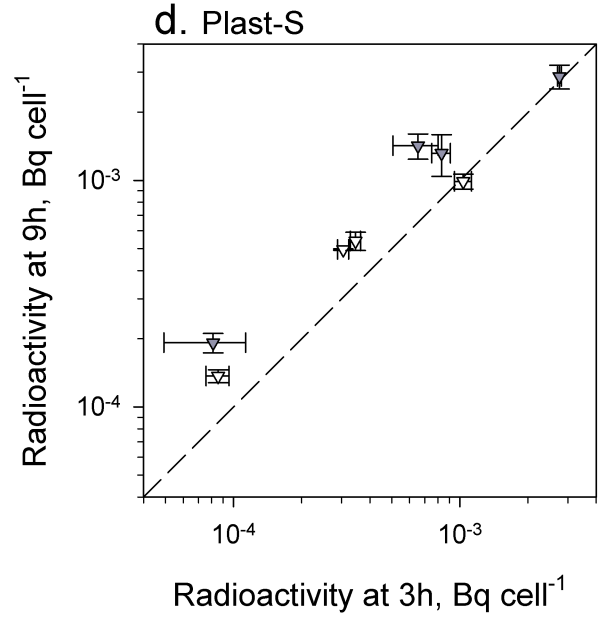

SG 2008 a. Bacterioplankton

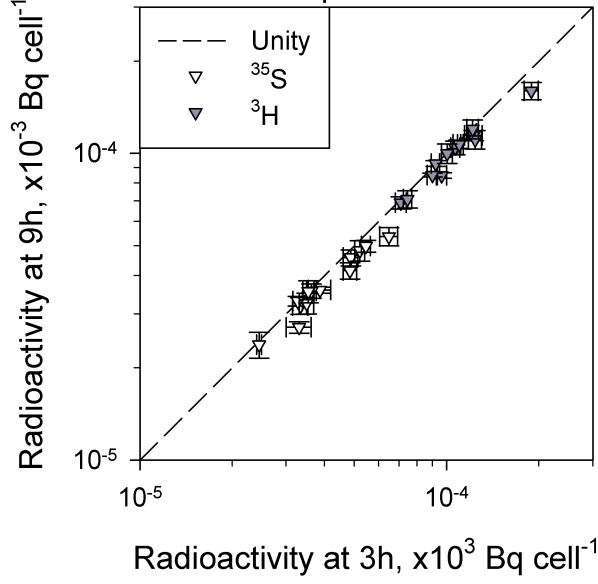

b. Aplast

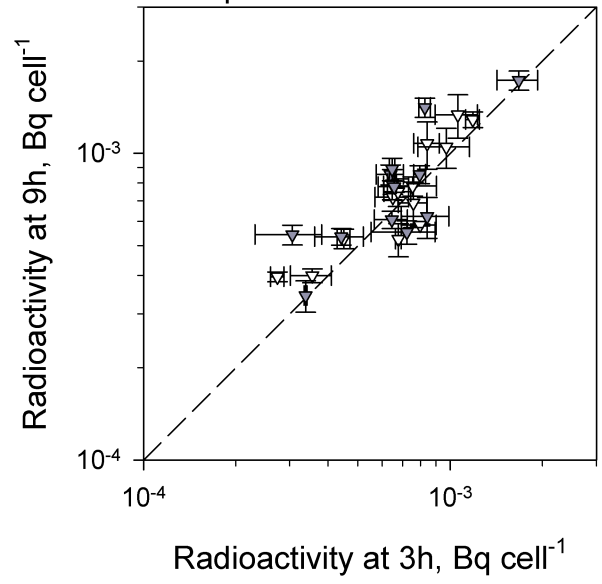

c. Plast-L

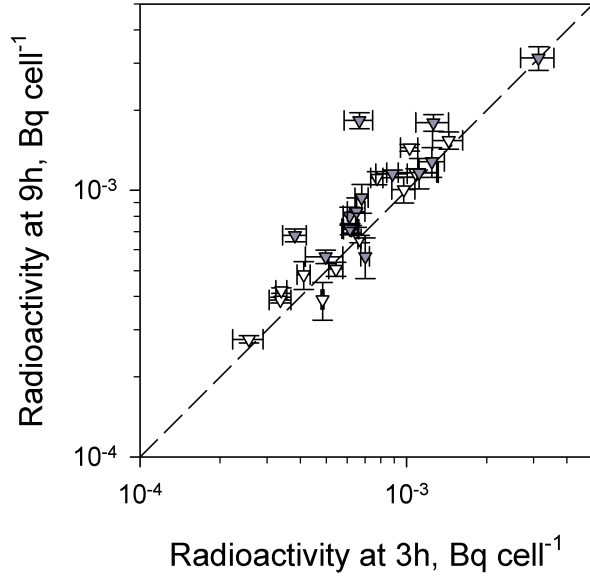

d. Plast-S

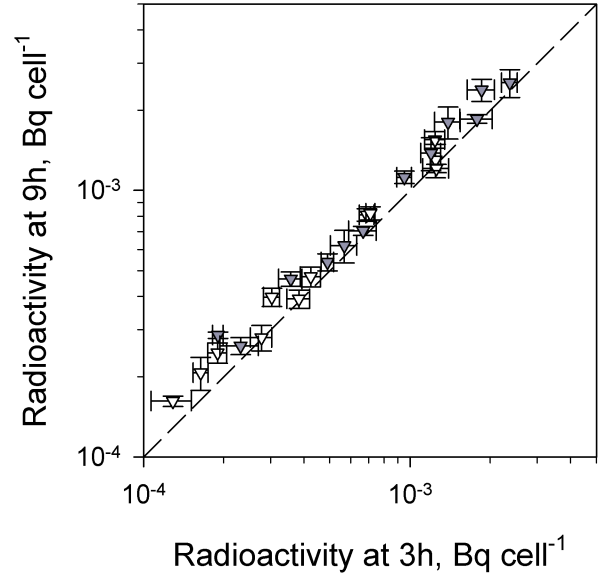

SG 2009 a. Bacterioplankton

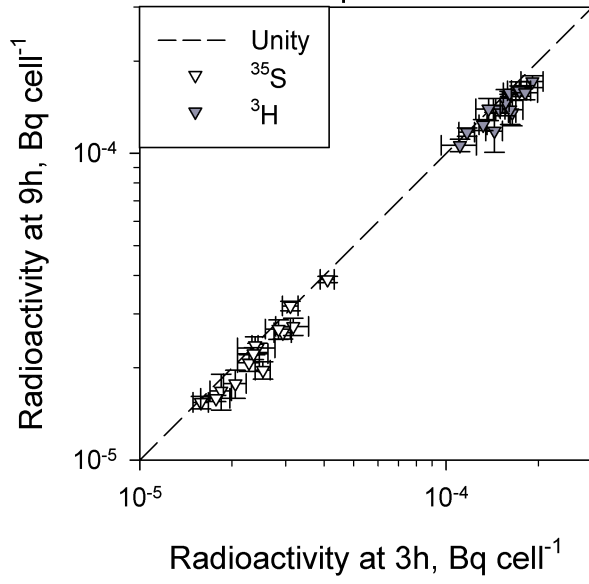

b. Aplast

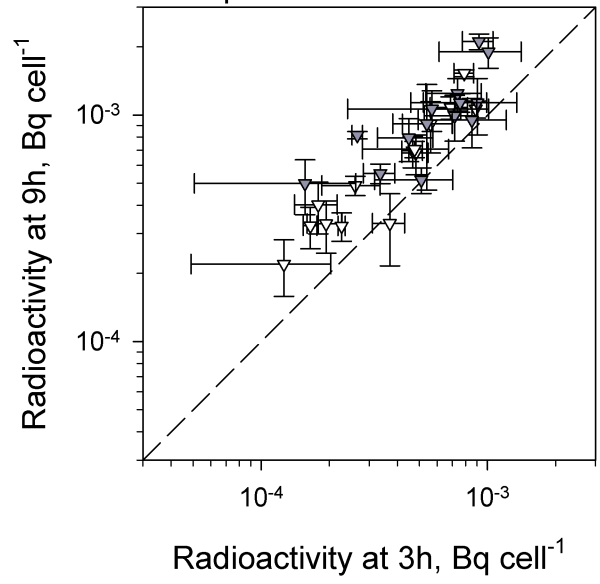

c. Plast-L

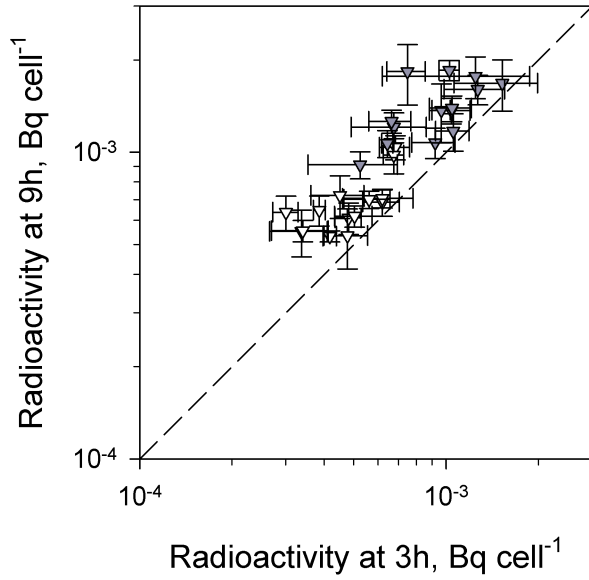

d. Plast-S

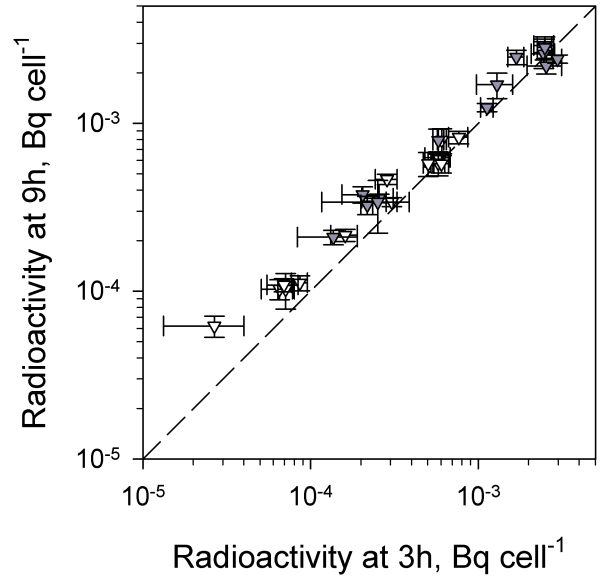

SG 2010 a. Bacterioplankton

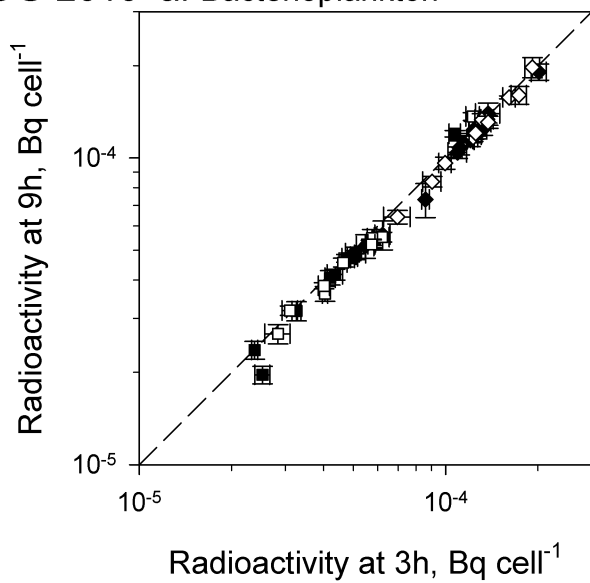

b. Aplast

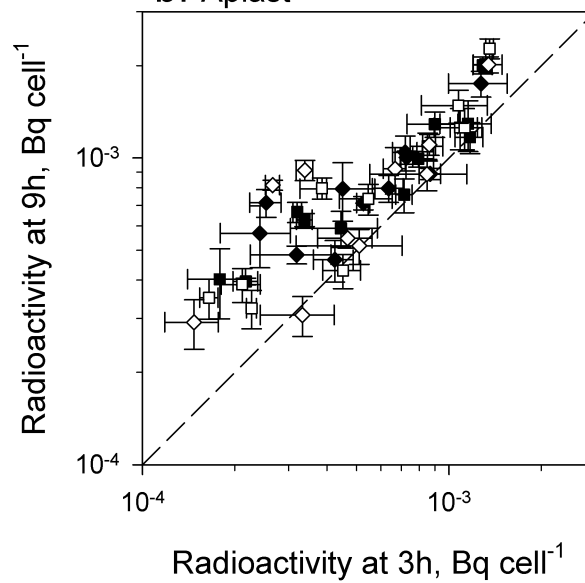

c. Plast-L

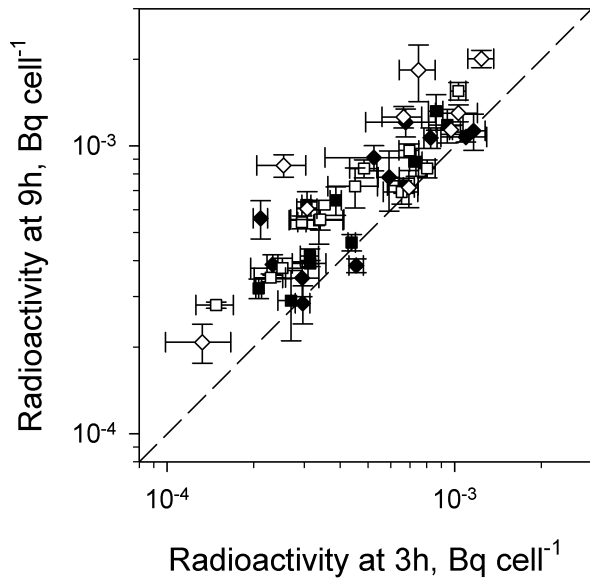

d. Plast-S

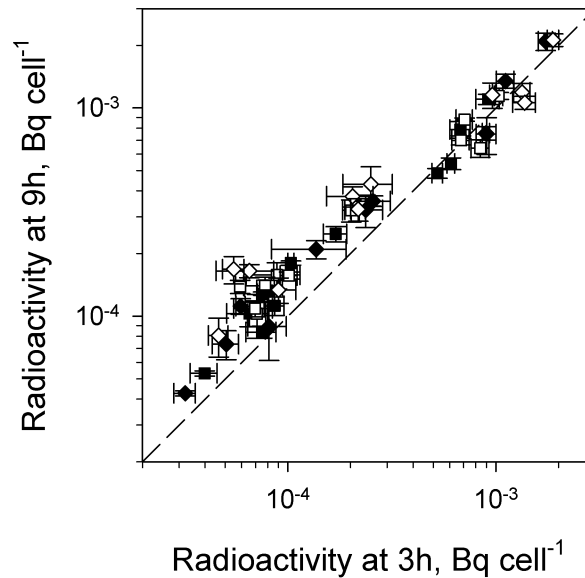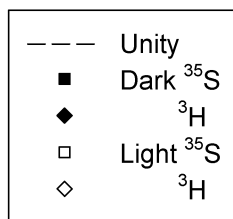

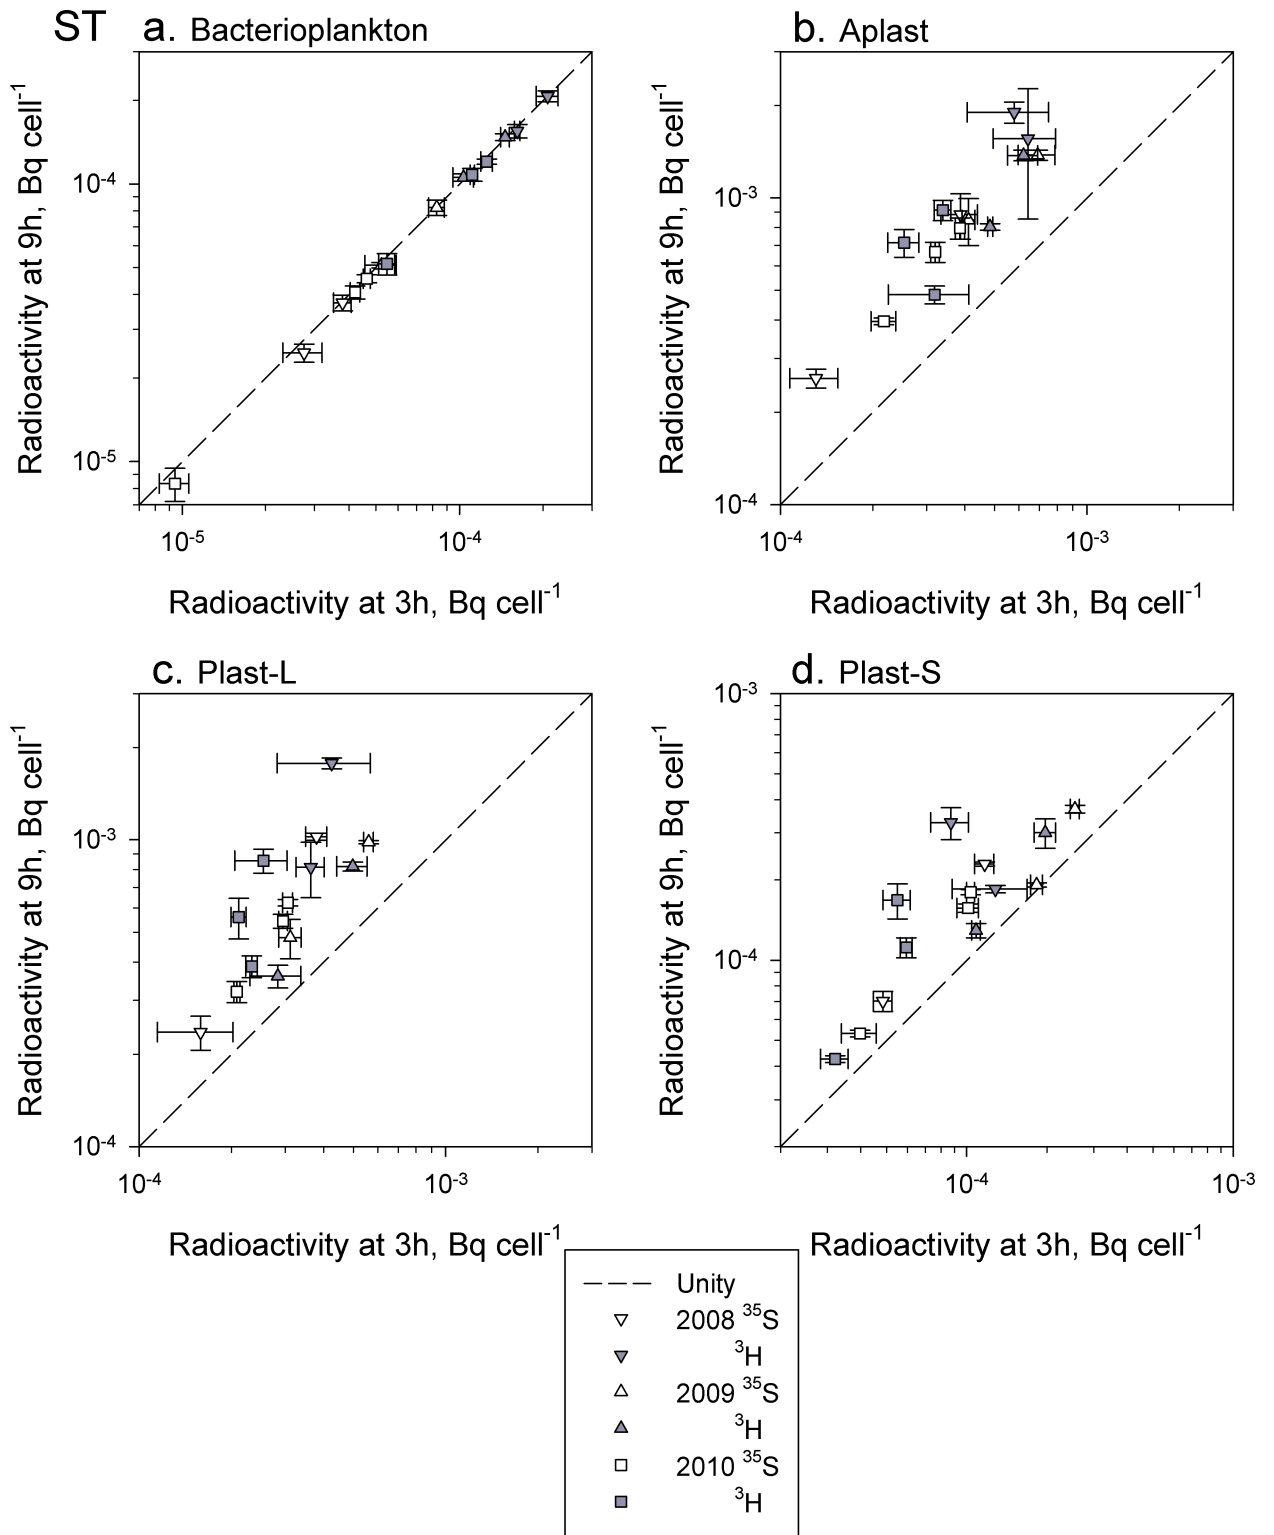

Supplement: 1118179109_sfig02.pdf [file 1118179109_sfig02.pdf]
